# Supplementary material for: Electronic Band Alignment of Aqueous Zinc Anode &amp; Favorable Chalcogenide Cathode- Cu2NiSnS4 (CNTS) Battery and its Performance Analysis
Source: Research Square preprint supplement (doi:10.21203/rs.3.rs-3917582/v1), 2024-02-13
Supplement: Supplementary file 1 [file e1ba861f52a82615f2de6f67.docx]

**Electronic Band Alignment of Aqueous Zinc Anode & Favorable Chalcogenide Cathode- Cu2NiSnS4 (CNTS) Battery and its Performance Analysis.**

Dhanaraj S. Nilegave, a b Ϯ Gulistan Y. Shaikh**,** a b ϮSwapnil S. Girawale**,** cSmita Chaturvedi*, a Vijay Jadhav*b

aInterdisciplinary School of Science, Savitribai Phule Pune University, Pune-411007, India

bDepartment of Physics, B.K. Birla College, Kalyan 421304, India

cCentre for energy studies, Savitribai Phule Pune University, Pune-411007, India

ϮAuthors contributed equally

**Correspondence:** Vijay Jadhav (**vijay.jadhav4@gmail.com**),Smita Chaturvedi (smitachaturvedi24@gmail.com)

CNTS in 0.1M ZnSO4 :Cyclic voltammogram, nyquist plot, bode-phase plot


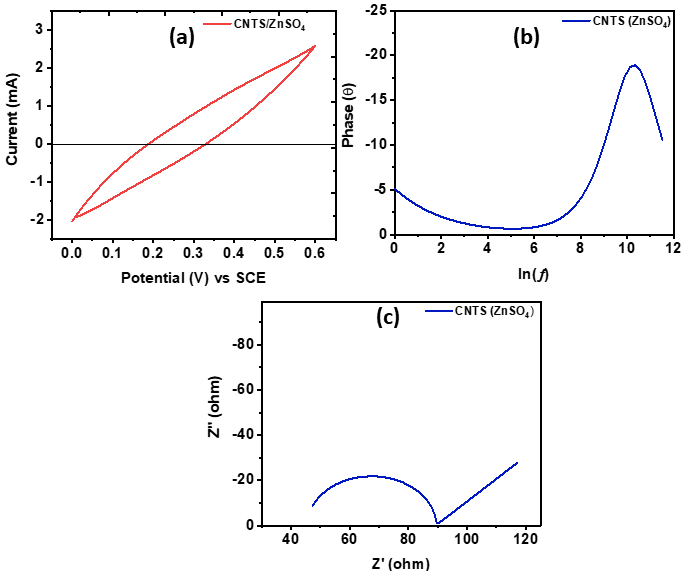


**SI.1** (a) Cyclic voltammetric curve, (b) nyquist plot and (c) bode-phase plot of CNTS cathode in 0.1M ZnSO4 solvent, observed in standard three electrode system.
